# Supplementary material for: Metformin stimulates IGFBP-2 gene expression through PPARalpha in diabetic states
Source: PubMed Central journal article supplement (PMC4806307; doi:10.1038/srep23665), 2016-03-24
Supplement: srep23665-s1.pdf [file srep23665-s1.pdf]

Supplementary Online Material for

**Metformin stimulates IGFBP-2 gene expression through  
PPARalpha in diabetic states**

Hye Suk Kang, Ho-Chan Cho, Jae-Ho Lee, Goo Taeg Oh, Seung-Hoi Koo, Byung-Hyun Park,  
In-Kyu Lee, Hueng-Sik Choi, Dae-Kyu Song, Seung-Soon Im

**Correspondence should be addressed to Seung-Soon Im (ssim73@kmu.ac.kr)**

## **Supplementary material and method**

**Recombinant adenovirus.** Adenoviruses overexpressing dominant negative (DN)-*Ampk $\alpha$ 1* has been described previously<sup>1</sup>.

## **Supplementary references**

1. Woods, A., *et al.* Characterization of the role of AMP-activated protein kinase in the regulation of glucose-activated gene expression using constitutively active and dominant negative forms of the kinase. *Molecular and cellular biology* **20**, 6704-6711 (2000).

**Supplementary Figure 1. Metformin-induced *Igfbp-2* gene expression is mediated by AMPK $\alpha$ 1.** (a) Expression of hepatic *Igfbp-2* in mouse primary hepatocytes. Mouse primary hepatocytes were infected with Ad-DN-*Ampk $\alpha$ 1* for 36 h and then treated with metformin for 12 h. (b) IGFBP2 protein level and AMPK phosphorylation in mouse primary hepatocytes for the indicated conditions. \*  $p < 0.05$  vs. untreated control and/or metformin-treated cells.

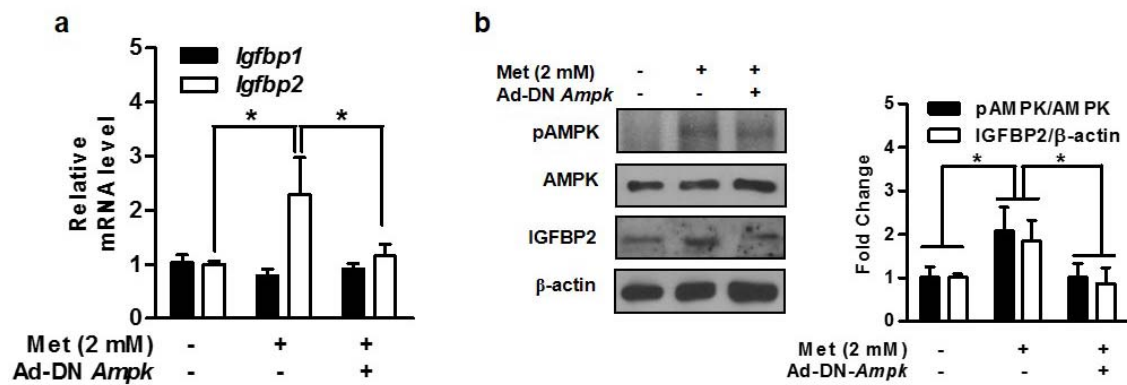

**Supplementary Figure 2. AMPK $\alpha$  expression is affected by Sirt1 expression level. (a)**

Effect of *Sirt1* depletion on expression of *AMPK $\alpha$ 1* and *AMPK $\alpha$ 2*. AML12 cells were infected with Ad-US or Ad-si *Sirt1* for 36 h and then treated with metformin for 12 h. (b)

Effect of *Sirt1* overexpression on *AMPK $\alpha$ 1* and *AMPK $\alpha$ 2* expression. Mouse primary hepatocytes were infected with Ad-GFP or Ad- *Sirt1* for 24 h and then treated with metformin for 12 h. \* $p < 0.05$ , \*\*  $p < 0.01$ , \*\*\*  $p < 0.001$  vs. untreated control.

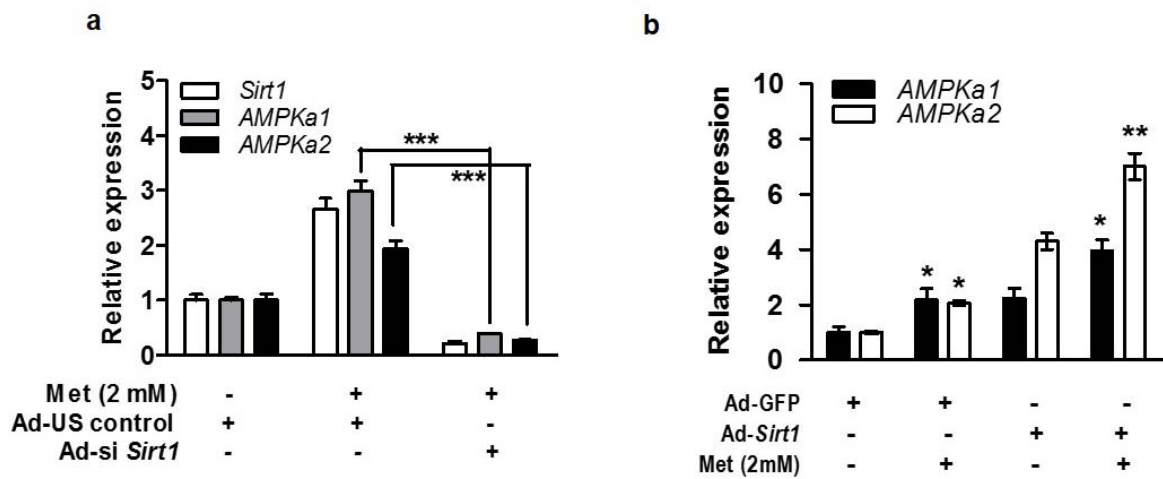

Supplementary Table 1. List of primers employed for gene expression analysis by real-time PCR.

|                | Forward primer (5'-3')  | Reverse primer (5'-3')  |
|----------------|-------------------------|-------------------------|
| <i>Igfbp-1</i> | ATCAGCCCATCCTGTGGAAC    | TGCAGCTAATCTCTCTAGCACTT |
| <i>Igfbp-2</i> | ACCCCTTGCCAGCAGGAGTTGGA | TCCCTGGATGGGCTTCCCGGT   |
| <i>Acc1</i>    | TGACAGACTGATCGCAGAGAAAG | TGGAGAGCCCCACACACA      |
| <i>Gpat</i>    | CAACACCATCCCCGACATC     | GTGACCTTCGATTATGCGATCA  |
| <i>Ppara</i>   | AGAGCCCCATCTGTCCTCTC    | ACTGGTAGTCTGCAAAACCAA   |
| <i>Sirt1</i>   | GCAGATTAGTAGGCGGCTTG    | TCTCCATCAGTCCCAAATCC    |
| <i>AMPKa1</i>  | GTCAAAGCCGACCCAATGATA   | CGTACACGAAATAATAGGGGTT  |
| <i>AMPKa2</i>  | TCCTGAAGACCCCTCCTACG    | GAGTGGTTCTCAGCTGTGCT    |
| <i>L32</i>     | ACATTTGCCCTGAATGTGGT    | ATCCTCTTGCCCTGATCCTT    |
